# Supplementary material for: Prolonged Aβ treatment leads to impairment in the ability of primary cortical neurons to maintain K+ and Ca2+ homeostasis
Source: Springer Nature journal article supplement (doi:10.1186/1750-1326-5-30), 2010-01-01
Supplement: Additional file 2 [file 1750-1326-5-30-s2.doc]

**Additional Figure S2**

**A**

**B**

Efflux Influx

**+aCMF**

**K+**

**Control**

Efflux Influx

**+aCMF**

**Ca2+**

**Control**
